# Supplementary material for: Ultrasound Elastography in the Evaluations of Tendon-Related Disorders—A Systematic Review
Source: MDPI journal article supplement (doi:10.3390/app13084920), 2023-04-14
Supplement: s1 [file s1]

Supplementary Table S1: Reason for exclusion. Paper excluded from the review and reasons for exclusion.

| ID | Motivation | Reference                                                                                                                                                                                                                                                                                                                                                 |
|----|------------|-----------------------------------------------------------------------------------------------------------------------------------------------------------------------------------------------------------------------------------------------------------------------------------------------------------------------------------------------------------|
| 1  | Population | Götschi T, Hanimann J, Schulz N, Huser S, Held V, Frey WO, Snedeker JG, Spörri J. Patellar Tendon Shear Wave Velocity Is Higher and has Different Regional Patterns in Elite Competitive Alpine Skiers than in Healthy Controls. <i>Front Bioeng Biotechnol.</i> 2022 Jun 9;10:858610. doi: 10.3389/fbioe.2022.858610. PMID: 35757800; PMCID: PMC9218688. |
| 2  | Population | Selcuk Can T, Ozdemir S, Yilmaz BK. Shear-Wave Elastography of Patellar Ligament and Achilles Tendon in Semiprofessional Athletes: Comparing With Nonexercising Individuals. <i>J Ultrasound Med.</i> 2022 Sep;41(9):2237-2246. doi: 10.1002/jum.15908. Epub 2021 Dec 3. PMID: 34862639.                                                                  |
| 3  | Population | Romer C, Czupajllo J, Zessin E, Fischer T, Wolfarth B, Lerchbaumer MH. Stiffness of Muscles and Tendons of the Lower Limb of Professional and Semiprofessional Athletes Using Shear Wave Elastography. <i>J Ultrasound Med.</i> 2022 Dec;41(12):3061-3068. doi: 10.1002/jum.16062. Epub 2022 Jul 28. PMID: 35900250.                                      |
| 4  | Population | Saha D, Prakash M, Sinha A, Singh T, Dogra S, Sharma A. Role of Shear-Wave Elastography in Achilles Tendon in Psoriatic Arthritis and Its Correlation with Disease Severity Score, Psoriasis Area and Severity Index. <i>Indian J Radiol Imaging.</i> 2022 Jul 13;32(2):159-165. doi: 10.1055/s-0042-1743116. PMID: 35924126; PMCID: PMC9340198.          |
| 5  | Population | Karataş A, Artaş H, Uğur K, Koca SS. Sonoelastographic finding of Achilles tendon in patients with ankylosing spondylitis and acromegaly. <i>Eur J Rheumatol.</i> 2022 Jul;9(3):122-125. doi: 10.5152/eujrheum.2022.21132. PMID: 35156618.                                                                                                                |
| 6  | Population | Chen L, Cheng Y, Zhou L, Zhang L, Deng X. Quantitative shear wave elastography compared to standard ultrasound (qualitative B-mode grayscale sonography and quantitative power Doppler) for evaluation of achillotendinopathy in treatment-naïve individuals: A cross-                                                                                    |

- sectional study. *Adv Clin Exp Med*. 2022 Aug;31(8):847-854. doi: 10.17219/acem/147878. PMID: 35593220.
- 7 Other focus Aggouras AN, Chimenti RL, Samuel Flemister A, Ketz J, Slane LC, Buckley MR, Richards MS. Impingement in Insertional Achilles Tendinopathy Occurs Across a Larger Range of Ankle Angles and Is Associated With Increased Tendon Thickness. *Foot Ankle Int*. 2022 May;43(5):683-693. doi: 10.1177/10711007211069570. Epub 2022 Jan 27. PMID: 35081809; PMCID: PMC9240994.
  - 8 Other focus Schillizzi G, Alviti F, D'Ercole C, Elia D, Agostini F, Mangone M, Paoloni M, Bernetti A, Pacini P, Polti G, Minafra P, Cantisani V. Evaluation of plantar fasciopathy shear wave elastography: a comparison between patients and healthy subjects. *J Ultrasound*. 2021 Dec;24(4):417-422. doi: 10.1007/s40477-020-00474-7. Epub 2020 May 16. PMID: 32418168; PMCID: PMC8572281.
  - 9 Other focus Zhou JP, Yu JF, Feng YN, Liu CL, Su P, Shen SH, Zhang ZJ. Modulation in the elastic properties of gastrocnemius muscle heads in individuals with plantar fasciitis and its relationship with pain. *Sci Rep*. 2020 Feb 17;10(1):2770. doi: 10.1038/s41598-020-59715-8. PMID: 32066869; PMCID: PMC7026110.
  - 10 Other focus Zhang C, Duan L, Liu Q, Zhang W. Application of shear wave elastography and B-mode ultrasound in patellar tendinopathy after extracorporeal shockwave therapy. *J Med Ultrason* (2001). 2020 Jul;47(3):469-476. doi: 10.1007/s10396-019-00979-7. Epub 2019 Nov 21. Erratum in: *J Med Ultrason* (2001). 2020 Jun 11;: PMID: 31754888.
  - 11 Other focus Gatz M, Betsch M, Dirrichs T, Schrading S, Tingart M, Michalik R, Quack V. Eccentric and Isometric Exercises in Achilles Tendinopathy Evaluated by the VISA-A Score and Shear Wave Elastography. *Sports Health*. 2020 Jul/Aug;12(4):373-381. doi: 10.1177/1941738119893996. Epub 2020 Jan 31. PMID: 32003647; PMCID: PMC7787566.
  - 12 Other focus Seo JB, Yoon SH, Lee JY, Kim JK, Yoo JS. What Is the Most Effective Eccentric Stretching Position in Lateral Elbow Tendinopathy? *Clin*

- Orthop Surg. 2018 Mar;10(1):47-54. doi: 10.4055/cios.2018.10.1.47. Epub 2018 Feb 27. PMID: 29564047; PMCID: PMC5851854.
- 13 Other focus Zhang ZJ, Ng GYF, Lee WC, Fu SN. Increase in passive muscle tension of the quadriceps muscle heads in jumping athletes with patellar tendinopathy. Scand J Med Sci Sports. 2017 Oct;27(10):1099-1104. doi: 10.1111/sms.12749. Epub 2016 Aug 19. PMID: 27539811.
  - 14 Other focus Leong HT, Hug F, Fu SN. Increased Upper Trapezius Muscle Stiffness in Overhead Athletes with Rotator Cuff Tendinopathy. PLoS One. 2016 May 9;11(5):e0155187. doi: 10.1371/journal.pone.0155187. PMID: 27159276; PMCID: PMC4861275.
  - 15 Other focus Lin YH, Chiou HJ, Wang HK, Lai YC, Chou YH, Chang CY. Management of rotator cuff calcific tendinosis guided by ultrasound elastography. J Chin Med Assoc. 2015 Oct;78(10):603-9. doi: 10.1016/j.jcma.2015.05.006. Epub 2015 Jul 2. PMID: 26143386.
  - 16 No Ultrasonography Finnamore E, Waugh C, Solomons L, Ryan M, West C, Scott A. Transverse tendon stiffness is reduced in people with Achilles tendinopathy: A cross-sectional study. PLoS One. 2019 Feb 20;14(2):e0211863. doi: 10.1371/journal.pone.0211863. PMID: 30785895; PMCID: PMC6382130.
  - 17 No Ultrasonography Zhang Q, Cai Y, Hua Y, Shi J, Wang Y, Wang Y. Sonoelastography shows that Achilles tendons with insertional tendinopathy are harder than asymptomatic tendons. Knee Surg Sports Traumatol Arthrosc. 2017 Jun;25(6):1839-1848. doi: 10.1007/s00167-016-4197-8. Epub 2016 Jun 24. PMID: 27342984.
  - 18 Study design Götschi T, Franchi MV, Schulz N, Fröhlich S, Frey WO, Snedeker JG, Spörri J. Altered regional 3D shear wave velocity patterns in youth competitive alpine skiers suffering from patellar tendon complaints - a prospective case-control study. Eur J Sport Sci. 2022 Jul 5:1-9. doi: 10.1080/17461391.2022.2088404. Epub ahead of print. PMID: 35699187.
  - 19 Study design Gatz M, Bode D, Betsch M, Quack V, Tingart M, Kuhl C, Schradling S, Dirrichs T. Multimodal Ultrasound Versus MRI for the Diagnosis and Monitoring of Achilles Tendinopathy: A Prospective Longitudinal

- Study. Orthop J Sports Med. 2021 Apr 13;9(4):23259671211006826. doi: 10.1177/23259671211006826. PMID: 33912619; PMCID: PMC8047827.
- 20 Study design Zhou J, Yang DB, Wang J, Li HZ, Wang YC. Role of shear wave elastography in the evaluation of the treatment and prognosis of supraspinatus tendinitis. World J Clin Cases. 2020 Jul 26;8(14):2977-2987. doi: 10.12998/wjcc.v8.i14.2977. PMID: 32775379; PMCID: PMC7385596
- 21 Study design Corrigan P, Cortes DH, Pohlig RT, Grävare Silbernagel K. Tendon Morphology and Mechanical Properties Are Associated With the Recovery of Symptoms and Function in Patients With Achilles Tendinopathy. Orthop J Sports Med. 2020 Apr 30;8(4):2325967120917271. doi: 10.1177/2325967120917271. PMID: 32426410; PMCID: PMC7218994
- 22 Study design Brage K, Juul-Kristensen B, Hjarbaek J, Boyle E, Kjaer P, Ingwersen KG. Strain Elastography and Tendon Response to an Exercise Program in Patients With Supraspinatus Tendinopathy: An Exploratory Study. Orthop J Sports Med. 2020 Dec 16;8(12):2325967120965185. doi: 10.1177/2325967120965185. PMID: 33403207; PMCID: PMC7747122.
- 23 Study design Dirrichs T, Quack V, Gatz M, Tingart M, Rath B, Betsch M, Kuhl CK, Schrading S. Shear Wave Elastography (SWE) for Monitoring of Treatment of Tendinopathies: A Double-blinded, Longitudinal Clinical Study. Acad Radiol. 2018 Mar;25(3):265-272. doi: 10.1016/j.acra.2017.09.011. Epub 2017 Nov 16. PMID: 29153963.
-

Supplementary Table S2: Study characteristics, concerning: Study population, pathology, US machine characteristics, patient position and, location of the probe.

| Authors (year)            | Study population | Pathology             | Tendon                 | US Information                                                                                                       | Patient position | Probe position and examination plane                                                                                                                                                                                                   |
|---------------------------|------------------|-----------------------|------------------------|----------------------------------------------------------------------------------------------------------------------|------------------|----------------------------------------------------------------------------------------------------------------------------------------------------------------------------------------------------------------------------------------|
| Sprague et al, 2022 [41]  | S                | Tendinopathy          | Patellar Tendon        | LOGIC e, GE Healthcare<br><br>Linear probe, 13-5 MHz<br><br>B-mode + SWE                                             | Prone            | Probe was positioned at the midline of the tendon from the ischial tuberosity to the inferior pole of the patella – Longitudinal plane<br><br>Probe was positioned 1 cm distal to the inferior pole of the patella – Transversal plane |
| Ito et al, 2022 [42]      | S + AS           | Tendinopathy          | Patellar Tendon        | Ultrasonix, Vancouver, BC, Canada<br><br>Linear probe, 14-5 MHz<br><br>B-mode + SWE                                  | Seated           | Probe was placed 1 cm distal to the inferior pole of the patella<br><br>Longitudinal plane                                                                                                                                             |
| Elsayed et al, 2022 [43]  | S                | Lateral epicondylitis | Common Extensor Tendon | Toshiba Aplio 500, Toshiba Medical Systems Corporation, Tokyo, Japan<br><br>Linear probe, 12 MHz<br><br>B-mode + SWE | Seated           | Probe should be applied perpendicular to the lateral epicondyle. A scan of common extensor tendon attached to the humeral lateral epicondyle was acquired<br><br>Longitudinal plane                                                    |
| Corrigan et al, 2022 [44] | S                | Tendinopathy          | Achilles Tendon        | LOGIQ, GE Healthcare<br><br>Linear probe, 13-5 MHz<br><br>B-mode + SWE                                               | Prone            | Probe was applied on Achilles Tendon<br><br>Longitudinal and Transversal planes                                                                                                                                                        |

|                                |   |                 |                                                                                      |                                                                                   |        |                                                                                                                                                                                 |
|--------------------------------|---|-----------------|--------------------------------------------------------------------------------------|-----------------------------------------------------------------------------------|--------|---------------------------------------------------------------------------------------------------------------------------------------------------------------------------------|
| <b>Kandil et al, 2021 [22]</b> | S | Tendinopathy    | Achilles Tendon                                                                      | Aplio mx, Toshiba Medical Systems, Japan<br>Linear probe, 12-7 Mhz<br>B-mode + SE | Prone  | Examination included the full length of the tendon<br><br>Longitudinal and Transverse planes                                                                                    |
| <b>Ozel et al, 2021 [38]</b>   | S | Tendinopathy    | Supraspinatus and Subscapularis Tendons                                              | Esaote Mylab Seven eHD crystalline<br>Linear probe, 11-3 MHz<br>B-mode + SE       | Seated | The transducer was placed anterior to the acromioclavicular joint and was oriented at an angle of 45° anteriorly to examine the supraspinatus tendon.<br><br>Longitudinal plane |
| <b>Frere et al, 2021 [23]</b>  | S | Tendinopathy    | Subscapularis, Supraspinatus, Infraspinatus and Teres Minors Tendons                 | LOGIQ E9, GE Healthcare<br>Linear probe, 15-6 Mhz<br>B-mode + SE                  | Seated | EULAR guidelines<br><br>Longitudinal and Transverse planes                                                                                                                      |
| <b>Bang et al, 2021 [24]</b>   | S | Tendinopathy    | Common Flexor Tendons                                                                | LOGIQ E9, GE Healthcare<br>Linear probe, 15-6 MHz<br>B-mode + SE+ SWE             | Seated | From the insertion on the medial epicondyle to the musculotendinous junction<br><br>Longitudinal plane                                                                          |
| <b>Wada et al, 2020 [45]</b>   | S | Frozen Shoulder | Supraspinatus, Infraspinatus, Long Head Biceps Tendons, and Posterior Capsule Region | Aixplorer, Supersonic Imagine<br>Linear probe, 10-2 MHz<br>B-mode + SWE           | Seated | Alignment of the US transducer with the fiber orientation was achieved for all tissues. All muscles were measured at almost the middle of the muscles.                          |

|                                   |        |                                |                                         |                                                                                                        |        |                                                                                                                                    |
|-----------------------------------|--------|--------------------------------|-----------------------------------------|--------------------------------------------------------------------------------------------------------|--------|------------------------------------------------------------------------------------------------------------------------------------|
|                                   |        |                                |                                         |                                                                                                        |        | Longitudinal and Transverse planes                                                                                                 |
| <b>Gatz et al, 2020 [46]</b>      | S + AS | Tendinopathy                   | Achilles Tendon                         | Aixplorer, Supersonic Imagine<br><br>Linear probe, 18-4 MHz<br><br>B-mode + PD + SWE + UTC             | Prone  | ROIs were a circle of 3 mm of diameter and an individual area covering the whole tendon.<br><br>Longitudinal and Transverse plane  |
| <b>Breda et al, 2020 [47]</b>     | S + AS | Tendinopathy                   | Patellar Tendon                         | LOGIQ E9, GE Healthcare<br><br>Linear probe, 15-5 MHz (B-mode, PD); 10-3 MHz (SWE)<br><br>B-mode + SWE | Supine | Inferior patellar pole just in the field of view<br>Longitudinal and Transverse planes: B-mode + PD<br><br>Longitudinal plane: SWE |
| <b>Zhu et al, 2019 [25]</b>       | S      | Tendinopathy                   | Common Extensor Tendon                  | Aixplorer, SuperSonic Imagine<br><br>Linear probe, 15-4 MHz<br><br>B-mode + SWE                        | Seated | Probe was placed perpendicularly to the lateral epicondyle onto the skin surface with light contact<br><br>Longitudinal plane      |
| <b>Yurdaisik et al, 2019 [48]</b> | S      | Tendinopathy                   | Patellar Tendon                         | Mindray Resona<br><br>Linear probe, 9-3 MHz<br><br>SWE                                                 | Supine | Probe perpendicular to the tendon<br><br>Longitudinal plane                                                                        |
| <b>Yun et al, 2019 [49]</b>       | S + AS | Idiopathic Adhesive Capsulitis | Supraspinatus and infraspinatus Tendons | LOGIQ E9, GE Healthcare<br><br>Probe and frequency not declared<br><br>B-mode + SE + SWE               | Seated | Transducer at the distal portion of infraspinatus and supraspinatus, with an oblique coronal plane<br><br>Longitudinal plane       |

|                                  |        |                           |                                                                   |                                                                                          |        |                                                                                                                                                                                                                                                                     |
|----------------------------------|--------|---------------------------|-------------------------------------------------------------------|------------------------------------------------------------------------------------------|--------|---------------------------------------------------------------------------------------------------------------------------------------------------------------------------------------------------------------------------------------------------------------------|
| <b>Vasishta et al, 2019 [39]</b> | S      | Tendinopathy              | Supraspinatus Tendon                                              | Philips Affiniti 70<br>Linear probe, 12-5 MHz<br>B-mode + SE                             | Seated | Probe perpendicular to the supraspinatus, to avoid anisotropy<br><br>Longitudinal plane                                                                                                                                                                             |
| <b>Shin et al, 2019 [26]</b>     | S + AS | Tendinopathy              | Common Flexor Tendons                                             | Hitachi HiVISION Ascend<br>Linear probe, 12-5 MHz<br>B-mode + PD + SE                    | Seated | Probe parallel to the longitudinal axis of the common flexor tendon to minimize anisotropy<br><br>Longitudinal plane                                                                                                                                                |
| <b>Sahan et al, 2018 [27]</b>    | S + AS | Tendinopathy              | Long head of Biceps Tendon                                        | LOGIQ E9, GE Healthcare<br>Linear probe, 15-6 MHz<br>B-mode + SE + SWE                   | Seated | Tendon was examined in the bicipital groove<br><br>Longitudinal and Transverse planes                                                                                                                                                                               |
| <b>Ghandour et al, 2018 [28]</b> | S + AS | De Quervain Tenosynovitis | Abductor Pollicis Longus and the Extensor Pollicis Brevis Tendons | Philips iU22 xMatrix<br>Linear probe, 12-5 MHz<br>B-mode + SE                            | Seated | Abductor pollicis longus and the extensor pollicis brevis tendons were imaged<br><br>Longitudinal and Transverse planes                                                                                                                                             |
| <b>El Badry et al, 2018 [29]</b> | S + AS | Tendinopathy              | Achilles tendon                                                   | US machine not declared<br>Linear probe, 12 MHz<br>B-mode + SWE + Transient elastography | Prone  | The Achilles tendon was divided into three segments for imaging evaluation: (I) proximal (musculotendinous junction), (II) middle (2–6 cm above insertion at the calcaneus) and (III) distal (insertion at the calcaneus)<br><br>Longitudinal and Transverse planes |



|                                  |        |                                   |                                        |                                                                               |                                                     |                                                                                                                               |
|----------------------------------|--------|-----------------------------------|----------------------------------------|-------------------------------------------------------------------------------|-----------------------------------------------------|-------------------------------------------------------------------------------------------------------------------------------|
| <b>Arslan et al, 2018</b> [30]   | S + AS | Tendinopathy                      | Common Extensor Tendon                 | Toshiba Aplio 500<br>Linear probe, 14 MHz<br>B-mode + PD + SE                 | Seated                                              | The entire tendon from anterior to posterior margin was imaged<br><br>Longitudinal plane                                      |
| <b>Turkay et al, 2017</b> [31]   | S + AS | De Quervain Tenosynovitis         | First Extensor Compartment of the Hand | Toshiba Aplio 500<br>Linear probe, 12 MHz<br>B-mode + SWE                     | Seated                                              | Short axis of the tendon was imaged<br><br>Transverse plane                                                                   |
| <b>Coombes et al, 2017</b> [32]  | S + AS | Tendinopathy                      | Patellar and Achilles Tendons          | Aixplorer vers. 8.2<br>Linear probe, 15-4 MHz<br>B-mode + SE                  | Prone (Achilles Tendon)<br>Supine (Patellar Tendon) | Tendons were imaged in the plane with the collagen fibers<br><br>Longitudinal plane                                           |
| <b>Chimenti et al, 2017</b> [50] | S      | Tendinopathy                      | Achilles Tendon                        | Ultrasonix<br>Linear probe, 18-4 MHz<br>B-mode + SE                           | Standing                                            | Probe was placed over the tendon insertion<br><br>Longitudinal plane                                                          |
| <b>Ooi et al, 2016</b> [34]      | S      | Tendinopathy                      | Patellar Tendon                        | Philips iU22<br>Linear probe, 17-5 MHz<br>B-mode + PD + SWE                   | Supine                                              | Probe was placed over the tendon<br><br>Longitudinal and Transverse planes                                                    |
| <b>Lee et al, 2016</b> [51]      | S      | Tendinopathy                      | Supraspinatus Tendon                   | Hitachi Medical System<br>Linear probe, frequency not declared<br>B-mode + SE | Seated                                              | Probe was placed anterior to the acromioclavicular joint and oriented at an angle of 45° anteriorly<br><br>Longitudinal plane |
| <b>Kocyigit et al, 2016</b> [52] | S      | Sub Acromial Impingement Syndrome | Supraspinatus Tendon                   | LOGIQ E9, GE Healthcare<br>Linear probe, 15-9 MHz                             | Seated                                              | Probe was positioned perpendicular to avoid anisotropy                                                                        |

|                                  |        |                       |                                                |                                                                              |                                                                                        |                                                                                                                                                                       |
|----------------------------------|--------|-----------------------|------------------------------------------------|------------------------------------------------------------------------------|----------------------------------------------------------------------------------------|-----------------------------------------------------------------------------------------------------------------------------------------------------------------------|
|                                  |        |                       |                                                | B-mode + SE                                                                  |                                                                                        | Longitudinal Plane                                                                                                                                                    |
| <b>Kocyigit et al, 2016 [53]</b> | S      | Lateral Epicondylitis | Common Extensor Tendon                         | LOGIQ E9, GE Healthcare<br>Linear probe, 15-9 MHz<br>B-mode + SE             | Seated                                                                                 | Probe was placed parallel to the common extensor tendon. The entire tendon origin from the anterior edge to the posterior edge was scanned.<br><br>Longitudinal plane |
| <b>Dirrichs et al, 2016 [54]</b> | S      | Tendinopathy          | Achilles, Patellar and Common Extensor Tendons | Aixplorer, SuperSonic Imagine<br>Linear probe, 15-4 MHz<br>B-mode + PD + SWE | Supine (Achilles Tendon)<br>Prone (Patellar Tendon)<br>Seated (Common Extensor Tendon) | Analysis was performed in three representative locations of the proximal, mid and distal portions of the tendons<br><br>Longitudinal plane                            |
| <b>Tudisco et al, 2015 [55]</b>  | S      | Small tendon tear     | Supraspinatus Tendon                           | Philips iU22<br>Linear probe, 7.5 MHz<br>B-mode + SE                         | Seated                                                                                 | Probe was perpendicular to the tendon; light repetitive compressions were applied over the ROI<br>Longitudinal and Transverse planes                                  |
| <b>Seo et al, 2015 [40]</b>      | S      | Tendinopathy          | Supraspinatus Tendon                           | Siemens Acuson S2000<br>Linear probe, 12 MHz<br>B-mode + SE                  | Seated                                                                                 | Probe was perpendicular to supraspinatus tendon.<br><br>Longitudinal plane.                                                                                           |
| <b>Ooi et al, 2015 [33]</b>      | S + AS | Tendinopathy          | Achilles Tendon                                | Philips iU22<br>Linear probe, 17-5 MHz<br>B-mode + SE                        | Prone                                                                                  | Tendon was imaged from calcaneal insertion to myotendinous junction<br><br>Longitudinal and Transverse plane                                                          |

|                                  |        |                                     |                                                                                              |                                                                                    |              |                                                                                                                                           |
|----------------------------------|--------|-------------------------------------|----------------------------------------------------------------------------------------------|------------------------------------------------------------------------------------|--------------|-------------------------------------------------------------------------------------------------------------------------------------------|
| <b>Galletti et al, 2015</b> [37] | S      | Tendinopathy;<br>Surgical treatment | Elbow (not specified);<br>Shoulder (not specified);<br>Patellar tendon and<br>Plantar Fascia | Hitachi Preyrus<br><br>Linear probe, 15-6 MHz<br><br>B-mode + PD + SE              | Not declared | Care was taken to hold the probe perpendicular to the target tissues<br><br>Plane not declared                                            |
| <b>Aubry et al, 2015</b> [56]    | S + AS | Tendinopathy                        | Achilles Tendon                                                                              | Aixplorer, SuperSonic Imagine<br><br>Linear probe, 12 MHz<br><br>B-mode + PD + SWE | Prone        | Probe was placed on the tendon<br><br>Longitudinal and Transverse planes                                                                  |
| <b>Zhang et al, 2014</b> [57]    | S + AS | Tendinopathy                        | Patellar Tendon                                                                              | Aixplorer, Supersonic Imagine<br><br>Linear probe, 15-4 MHz<br><br>B-mode + SWE    | Supine       | Probe was located at the inferior pole of the patella<br><br>Longitudinal plane                                                           |
| <b>Seo et al, 2014</b> [35]      | S + AS | Tendinopathy                        | Biceps Tendon                                                                                | Siemens Acuson S2000<br><br>Linear probe, 9-4 MHz<br><br>B-mode + SE               | Seated       | Probe was placed perpendicular to long head of biceps at the anterior aspect of the shoulder<br><br>Longitudinal and Transverse planes    |
| <b>Giyuoung et al, 2014</b> [36] | S      | Tendinopathy                        | Common Extensor Tendon                                                                       | Acuson Antares, premium edition, Siemens Healthcare                                | Seated       | Tendon was imaged from the musculotendinous junction to the insertion of the lateral epicondyle<br><br>Longitudinal and Transverse planes |

|                                                                                                                    |        |                            |                        |                                                                  |        |                                                                                                            |
|--------------------------------------------------------------------------------------------------------------------|--------|----------------------------|------------------------|------------------------------------------------------------------|--------|------------------------------------------------------------------------------------------------------------|
| <b>Ahn et al, 2014 [58]</b>                                                                                        | S + AS | Tendinopathy               | Common Extensor Tendon | Philips iU22<br>Linear probe, 12-5 MHz<br>B-mode + PD + SE       | Seated | The entire tendon was imaged, from anterior to posterior edges<br><br>Longitudinal planes                  |
| <b>Sconfienza et al, 2010 [59]</b>                                                                                 | S + AS | Tendon pain due to overuse | Achilles Tendon        | Logos EUB 8500, Hitachi<br>Linear probe, 10-6 MHz<br>B-mode + SE | Prone  | The probe was placed on the calcaneal enthesis and above the retrocalcaneal Bursa<br><br>Longitudinal lane |
| Abbrev: S: symptomatic; AS: asymptomatic; PD: power doppler; SE: strain elastography; SWE: shear wave elastography |        |                            |                        |                                                                  |        |                                                                                                            |

Supplementary Table S3: Shear wave elastographic values, classified in: Shear wave velocity (m/s) and Shear modulus (kPa)

| Study                               | US information                                                                                                             | Shear Wave Velocity (m/s)                                                                                                             | Shear Modulus (kPa)                                                                                                                     |
|-------------------------------------|----------------------------------------------------------------------------------------------------------------------------|---------------------------------------------------------------------------------------------------------------------------------------|-----------------------------------------------------------------------------------------------------------------------------------------|
| <b>Sprague et al, 2022</b><br>[41]  | LOGIC e, GE Healthcare<br><br>Linear probe, 13-5 MHz<br><br>B-mode + SWE                                                   |                                                                                                                                       | Patellar Tendinopathy<br><br>68.30 ± 23.30 mean                                                                                         |
| <b>Ito et al, 2022</b> [42]         | Ultrasonix, Vancouver, BC,<br>Canada<br><br>Linear probe, 14-5 MHz<br><br>B-mode + SWE                                     |                                                                                                                                       | Patellar Tendinopathy<br><br>83.30 ± 16.40 mean                                                                                         |
| <b>Elsayed et al, 2022</b><br>[43]  | Toshiba Aplio 500, Toshiba<br>Medical Systems Corporation,<br>Tokyo, Japan<br><br>Linear probe, 12 MHz<br><br>B-mode + SWE | Common Extensor Tendinopathy<br><br>Affected elbow: 9.50 ± 0.80 mean<br>Healthy elbow: 11.20 ± 0.70 mean                              |                                                                                                                                         |
| <b>Corrigan et al, 2022</b><br>[44] | LOGIQ, GE Healthcare<br><br>Linear probe, 13-5 MHz<br><br>B-mode + SWE                                                     |                                                                                                                                       | Achilles Tendinopathy<br><br>Most symptomatic limb:<br>88.90 ± 34.30<br>Least symptomatic limb:<br>85.10 ± 31.50                        |
| <b>Bang et al, 2021</b> [24]        | LOGIQ E9, GE Healthcare<br><br>Linear probe, 15-6 MHz<br><br>B-mode + SE+ SWE                                              | Epicondylitis<br><br>Group with Medial Epicondylitis:<br>1.69 ± 0.40 mean<br><br>Group without Medial Elbow Pain:<br>3.65 ± 0.60 mean | Epicondylitis<br><br>Group with Medial Epicondylitis:<br>9.77 ± 4.65 mean<br><br>Group without Medial Elbow Pain:<br>43.93 ± 14.76 mean |

|                                     |                                                                                                   |  |                                                                                                                                                                                                                                                                                                                                                                                                                                                                                                                                                                                                                                                              |
|-------------------------------------|---------------------------------------------------------------------------------------------------|--|--------------------------------------------------------------------------------------------------------------------------------------------------------------------------------------------------------------------------------------------------------------------------------------------------------------------------------------------------------------------------------------------------------------------------------------------------------------------------------------------------------------------------------------------------------------------------------------------------------------------------------------------------------------|
| <p><b>Wada et al, 2020 [45]</b></p> | <p>Aixplorer, Supersonic Imagine</p> <p>Linear probe, 10-2 MHz</p> <p>B-mode + SWE</p>            |  | <p>Rotator Cuff Tendons in Frozen Shoulder</p> <p>Freezing Phase</p> <p>Unaffected Side Supraspinatus Tendon:<br/>178.10 ± 73.30 mean</p> <p>Affected Side Supraspinatus Tendon:<br/>280.40 ± 125.30 mean</p> <p>Unaffected side Infraspinatus Tendon:<br/>240.80 ± 91.50 mean</p> <p>Affected Side infraspinatus Tendon:<br/>318.40 ± 110.70 mean</p> <p>Frozen Phase</p> <p>Unaffected Side Supraspinatus Tendon:<br/>244.30 ± 100.90 mean</p> <p>Affected Side Supraspinatus Tendon:<br/>245.00 ± 76.00 mean</p> <p>Unaffected side Infraspinatus Tendon:<br/>285.70 ± 88.50 mean</p> <p>Affected Side infraspinatus Tendon:<br/>268.80 ± 116.60 mean</p> |
| <p><b>Gatz et al, 2020 [46]</b></p> | <p>Aixplorer, Supersonic Imagine</p> <p>Linear probe, 18-4 MHz</p> <p>B-mode + PD + SWE + UTC</p> |  | <p>Achilles Tendinopathy</p> <p>Insertion</p> <p>Asymptomatic Unilateral Group 1:<br/>334.4 (76) SWE area</p> <p>Symptomatic Unilateral Group 2:<br/>284.7 (63) SWE area</p> <p>Reference Group 3:<br/>424.9 (71) SWE area</p> <p>Midportion</p> <p>Asymptomatic Unilateral Group 1:<br/>395.4 (64) SWE area</p> <p>Symptomatic Unilateral Group 2:</p>                                                                                                                                                                                                                                                                                                      |

|                                   |                                                                                                        |                                                                                                                                                                                                                                                                       |                                                                                                                                                                                                                                                                             |
|-----------------------------------|--------------------------------------------------------------------------------------------------------|-----------------------------------------------------------------------------------------------------------------------------------------------------------------------------------------------------------------------------------------------------------------------|-----------------------------------------------------------------------------------------------------------------------------------------------------------------------------------------------------------------------------------------------------------------------------|
|                                   |                                                                                                        |                                                                                                                                                                                                                                                                       | 352.6 (72) SWE area<br>Reference Group 3:<br>465.4 (60) SWE area                                                                                                                                                                                                            |
| <b>Breda et al, 2020</b> [47]     | LOGIQ E9, GE Healthcare<br><br>Linear probe, 15-5 MHz (B-mode, PD); 10-3 MHz (SWE)<br><br>B-mode + SWE | Patellar Tendinopathy<br><br>Athletes with Patellar Tendinopathy<br>Analysis 1: 74.9 (56.4-105.4);<br>Analysis 2: 69.9 (54.7-100.3) mean value<br><br>Healthy Athletes<br>Examiner 1: 35.7 (29.2-43.6);<br>Examiner 2: 30.4 (24.8-38.9) mean value                    |                                                                                                                                                                                                                                                                             |
| <b>Zhu et al, 2019</b> [25]       | Aixplorer, SuperSonic Imagine<br><br>Linear probe, 15-4 MHz<br><br>B-mode + SWE                        | Common Extensor Tendon in Lateral Epicondylitis<br><br>Lateral Epicondylitis:<br>9.60 ± 1.40 mean value<br><br>Healthy Elbows:<br>13.60 ± 1.10 mean value                                                                                                             |                                                                                                                                                                                                                                                                             |
| <b>Yurdaisik et al, 2019</b> [48] | Mindray Resona<br><br>Linear probe, 9-3 MHz<br><br>SWE                                                 |                                                                                                                                                                                                                                                                       | Patellar Tendinopathy<br><br>SWE 83.80 ± 34.3 mean<br>pSWE (point-SWE) 29.30 ± 33.80 mean                                                                                                                                                                                   |
| <b>Yun et al, 2019</b> [49]       | LOGIQ E9, GE Healthcare<br><br>Probe and frequency not declared<br><br>B-mode + SE + SWE               | Idiopathic Adhesive Capsulitis<br><br>Supraspinatus Tendon ACS Group:<br>3.29 (2.01-4.34) mean<br>Supraspinatus Tendon Control Group:<br>1.04 (0.83-1.29) mean<br><br>Infraspinatus Tendon ACS Group:<br>2.67 (2.11-4.68) mean<br>Infraspinatus Tendon Control Group: | Idiopathic Adhesive Capsulitis<br><br>Supraspinatus Tendon ACS Group:<br>32.55 (12.14-56.41) mean<br>Supraspinatus Tendon Control Group:<br>3.24 (2.08-5.02) mean<br><br>Infraspinatus Tendon ACS Group:<br>19.49 (13.39-65.98) mean<br>Infraspinatus Tendon Control Group: |

|                                  |                                                                                                  |                                                                                                                                                                                                                                                                                                                |                                                                                                                                |
|----------------------------------|--------------------------------------------------------------------------------------------------|----------------------------------------------------------------------------------------------------------------------------------------------------------------------------------------------------------------------------------------------------------------------------------------------------------------|--------------------------------------------------------------------------------------------------------------------------------|
|                                  |                                                                                                  | 1.11 (0.94-1.32) mean                                                                                                                                                                                                                                                                                          | 3.49 (2.66-5.25) mean                                                                                                          |
| <b>Sahan et al, 2018 [27]</b>    | LOGIQ E9, GE Healthcare<br><br>Linear probe, 15-6 MHz<br><br>B-mode + SE + SWE                   | Tendinosis of the Long Head of Biceps Tendon<br><br>LHB Tendinosis Group:<br>transverse plane<br>38.32 ± 7.00 (28.4-55.9) mean<br>longitudinal plan<br>39.42 ± 7.4 (28-54) mean<br><br>Control Group:<br>transverse plane<br>18.60 ± 3.40 (14.3-28.8) mean<br>longitudinal plane<br>20.62 ± 4.6 (13.3-30) mean |                                                                                                                                |
| <b>El Badry et al, 2018 [29]</b> | US machine not declared<br><br>Linear probe, 12 MHz<br><br>B-mode + SWE + Transient elastography | Achilles Tendinopathy<br><br>Musculotendinous Junction:<br>8.45 ± 4.97 mean<br>Middle (2-6 cm above CI) and Calcaneous Insertion:<br>1.25 ± 0.99 mean<br>Control Proximal segment<br>7.55 ± 4.06 mean<br>Control Middle segment<br>8.24 ± 6.18 mean                                                            |                                                                                                                                |
| <b>Turkay et al, 2017 [31]</b>   | Toshiba Aplio 500<br><br>Linear probe, 12 MHz<br><br>B-mode + SWE                                |                                                                                                                                                                                                                                                                                                                | De Quervain Tenosynovitis<br><br>Patient Group :<br>29.75 ± 8.02 (18-47) mean<br>Control Group:<br>69.17 ± 22.45 (30-128) mean |
| <b>Coombes et al, 2017 [32]</b>  | Aixplorer vers. 8.2<br><br>Linear probe, 15-4 MHz                                                | Achilles and Patellar Tendinopathies<br><br>Mid Achilles:                                                                                                                                                                                                                                                      |                                                                                                                                |



|                                     |                                                                                             |                                                                                                                                                                                                                                                                                                                                                                                                                                                                                   |                                                                                                                                                                                                                                                                                                         |
|-------------------------------------|---------------------------------------------------------------------------------------------|-----------------------------------------------------------------------------------------------------------------------------------------------------------------------------------------------------------------------------------------------------------------------------------------------------------------------------------------------------------------------------------------------------------------------------------------------------------------------------------|---------------------------------------------------------------------------------------------------------------------------------------------------------------------------------------------------------------------------------------------------------------------------------------------------------|
|                                     | B-mode + SE                                                                                 | <p>10.60 ± 0.95 mean;<br/>Insertional Achilles:<br/>9.90 ± 1.40 mean;</p> <p>Mid Patellar:<br/>6.10 ± 0.80 mean;<br/>Proximal Patellar:<br/>6.40 ± 1.20 mean;</p>                                                                                                                                                                                                                                                                                                                 |                                                                                                                                                                                                                                                                                                         |
| <b>Dirrichs et al, 2016</b><br>[54] | <p>Aixplorer, SuperSonic Imagine</p> <p>Linear probe, 15-4 MHz</p> <p>B-mode + PD + SWE</p> | <p>Achilles Tendon<br/>Symptomatic: 4.22 ± 2.78 mean<br/>Asymptomatic: 7.17 ± 3.07 mean</p> <p>Patellar Tendon<br/>Symptomatic: 4.33 ± 2.47 mean<br/>Asymptomatic: 7.66 ± 2.46 mean</p> <p>Epicondylitis Humeri<br/>Symptomatic: 4.62 ± 3.13 mean<br/>Asymptomatic: 7.66 ± 2.46 mean</p>                                                                                                                                                                                          | <p>Achilles Tendon<br/>Symptomatic: 53.40 ± 23.20 mean<br/>Asymptomatic: 154.20 ± 28.30 mean</p> <p>Patellar Tendon<br/>Symptomatic: 56.30 ± 18.30 mean<br/>Asymptomatic: 176.20 ± 18.20 mean</p> <p>Epicondylitis Humeri<br/>Symptomatic: 64.10 ± 29.30 mean<br/>Asymptomatic: 176.20 ± 18.20 mean</p> |
| <b>Aubry et al, 2015</b><br>[56]    | <p>Aixplorer, SuperSonic Imagine</p> <p>Linear probe, 12 MHz</p> <p>B-mode + PD + SWE</p>   | <p>Achilles Tendon</p> <p>Position 1: maximal plantar flexion<br/>Healthy Tendons of Volunteers:<br/>sagittal mean velocity: 6.58<br/>axial mean velocity: 5.02<br/>Asymptomatic Tendons of Patients:<br/>sagittal mean velocity: 6.90<br/>axial mean velocity: 4.75</p> <p>Position 2: 0° flexion<br/>Healthy Tendons of Volunteers:<br/>sagittal mean velocity: 15.75<br/>axial mean velocity: 5.51<br/>Asymptomatic Tendons of Patients:<br/>sagittal mean velocity: 15.58</p> |                                                                                                                                                                                                                                                                                                         |

|                                  |                                                                                 |                           |                                                                                                                                                                                                                                                                                                  |
|----------------------------------|---------------------------------------------------------------------------------|---------------------------|--------------------------------------------------------------------------------------------------------------------------------------------------------------------------------------------------------------------------------------------------------------------------------------------------|
|                                  |                                                                                 | axial mean velocity: 5.37 |                                                                                                                                                                                                                                                                                                  |
| <b>Zhang et al, 2014</b><br>[57] | Aixplorer, Supersonic Imagine<br><br>Linear probe, 15-4 MHz<br><br>B-mode + SWE |                           | Patellar Tendinopathy<br><br>Patellar Tendinopathy Group:<br>$43.60 \pm 17.90$ mean<br>Control Group: $27.50 \pm 11.30$<br>Painful Side: $43.60 \pm 17.90$ mean<br>Non-Painful Side: $25.80 \pm 10.60$ mean<br>Dominant Side: $27.50 \pm 11.30$ mean<br>Non Dominant Side: $27.90 \pm 8.40$ mean |

Supplementary Table S4: Strain elastographic values, classified in Strain ratio

| Study                            | US information                                                                           | Strain Ratio                                                                                                                                                                                                                                                                                           |
|----------------------------------|------------------------------------------------------------------------------------------|--------------------------------------------------------------------------------------------------------------------------------------------------------------------------------------------------------------------------------------------------------------------------------------------------------|
| <b>Ozel et al, 2021 [38]</b>     | Esaote Mylab Seven eHD<br>crystalline<br><br>Linear probe, 11-3 MHz<br><br>B-mode + SE   | Supraspinatus Tendinopathy<br>correlation with MRI Grade 0 1 2 3 4<br>Grade 0: $0.80 \pm 0.18$ mean<br>Grade I: $0.54 \pm 0.23$ mean<br>Grade II: $0.33 \pm 0.24$ mean<br>Grade III: $0.15 \pm 0.27$ mean<br>Grade IV: NA                                                                              |
| <b>Bang et al, 2021 [24]</b>     | LOGIQ E9, GE Healthcare<br><br>Linear probe, 15-6 MHz<br><br>B-mode + SE+ SWE            | Epicondylitis<br><br>Group with Medial Epicondylitis:<br>$0.48 \pm 0.22$ mean<br><br>Group without Medial Elbow Pain:<br>$0.95 \pm 0.16$ mean                                                                                                                                                          |
| <b>Yun et al, 2019 [49]</b>      | LOGIQ E9, GE Healthcare<br><br>Probe and frequency not declared<br><br>B-mode + SE + SWE | Idiopathic Adhesive Capsulitis<br><br>Supraspinatus Tendon ACS Group:<br>$0.13 (0.07-0.17)$ mean<br>Supraspinatus Tendon Control Group:<br>$0.38 (0.33-0.50)$ mean<br><br>Infraspinatus Tendon ACS Group:<br>$0.17 (0.07-0.19)$ mean<br>Infraspinatus Tendon Control Group:<br>$0.43 (0.33-0.50)$ mean |
| <b>Vasishta et al, 2019 [39]</b> | Philips Affiniti 70<br><br>Linear probe, 12-5 MHz<br><br>B-mode + SE                     | Supraspinatus Tendinopathy<br><br>Grade I: $0.76 \pm 0.32$<br>Grade II: $0.59 \pm 0.40$<br>Grade III: $0.31 \pm 0.10$<br>Grade IV: $0.15 \pm 0.02$<br>Mean value: $0.54 \pm 0.36$                                                                                                                      |

|                                  |                                                                               |                                                                                                                                                                                                                                                                                                                                                                                                                                                                                                                                                                                                                                                                                             |
|----------------------------------|-------------------------------------------------------------------------------|---------------------------------------------------------------------------------------------------------------------------------------------------------------------------------------------------------------------------------------------------------------------------------------------------------------------------------------------------------------------------------------------------------------------------------------------------------------------------------------------------------------------------------------------------------------------------------------------------------------------------------------------------------------------------------------------|
| <b>Shin et al, 2019 [26]</b>     | Hitachi HiVISION Ascend<br><br>Linear probe, 12-5 MHz<br><br>B-mode + PD + SE | Medial Epicondylitis<br><br>Group with Medial Epicondylitis:<br>0.39 ± 0.17 mean<br>Group without Medial Elbow Pain:<br>1.07 ± 0.28 mean                                                                                                                                                                                                                                                                                                                                                                                                                                                                                                                                                    |
| <b>Ghandour et al, 2018 [28]</b> | Philips iU22 xMatrix<br><br>Linear probe, 12-5 MHz<br><br>B-mode + SE         | De Quervain Tenosynovitis<br><br>Patient Group: 2.30 mean<br>Control Group: 6.10 mean                                                                                                                                                                                                                                                                                                                                                                                                                                                                                                                                                                                                       |
| <b>Arslan et al, 2018 [30]</b>   | Toshiba Aplio 500<br><br>Linear probe, 14 MHz<br><br>B-mode + PD + SE         | Lateral Epicondylitis<br><br>Symptomatic Tendons: 2.85 ± 1.99 mean<br>Asymptomatic Tendons: 7.41 ± 2.24 mean                                                                                                                                                                                                                                                                                                                                                                                                                                                                                                                                                                                |
| <b>Chimenti et al, 2017 [50]</b> | Ultrasonix<br><br>Linear probe, 18-4 MHz<br><br>B-mode + SE                   | Insertional Achilles Tendinopathy<br><br>Transverse Compressive Strain (%) Standing<br>IAT Group Deep Region: -5.57 ± 3.28;<br>Control Group Deep Region: -10.63 ± 3.87<br>IAT Group Superficial Region: -4.90 ± 2.83;<br>Control Group Superficial Group: -6.95 ± 3.18<br><br>Transverse Compression Strain (%) Partial Squat<br>IAT Group Deep Region: -9.44 ± 6.83;<br>Control Group Deep Region -20.06 ± 6.58<br>IAT Group Superficial region: -9.29 ± 6.23;<br>Control Group Superficial Region: -14.69 ± 5.98<br><br>Axial tensile Strain (%) Standing<br>IAT Group Deep Region: 1.36 ± 1.20;<br>Control Group Deep Region: 3.33 ± 0.97<br>IAT Group Superficial Region: 2.03 ± 1.07; |

|                           |                                                                                       |                                                                                                                                                                                                                                                                                                                                                                          |
|---------------------------|---------------------------------------------------------------------------------------|--------------------------------------------------------------------------------------------------------------------------------------------------------------------------------------------------------------------------------------------------------------------------------------------------------------------------------------------------------------------------|
|                           |                                                                                       | Control Group Superficial Region: $3.57 \pm 0.94$<br><br>Axial Tensile Strain (%) Partial Squat<br>IAT Group Deep Region: $4.87 \pm 3.71$ ;<br>Control Group Deep Region: $10.43 \pm 5.91$<br>IAT Group Superficial Region: $6.18 \pm 3.34$ ;<br>Control Group Superficial Region: $9.66 \pm 4.65$                                                                       |
| Lee et al, 2016 [51]      | Hitachi Medical System<br><br>Linear probe, frequency not declared<br><br>B-mode + SE | Rotator Cuff Tendinopathy<br><br>Fat/T index $6.92 \pm 7.73$ mean<br>(Fat/T strain ratio of subcutaneous fat to the tendon)<br>Pad/T index $40.25 \pm 41.06$ mean<br>(Pad/T strain ratio of the gel pad to the tendon)                                                                                                                                                   |
| Kocyigit et al, 2016 [52] | LOGIQ E9, GE Healthcare<br><br>Linear probe, 15-9 MHz<br><br>B-mode + SE              | Supraspinatus Tendons in Subacromial Impingement Syndrome<br><br>Shoulder with SIS: $0.71 \pm 0.25$ mean<br>Healthy Shoulder: $0.24 \pm 0.10$ mean                                                                                                                                                                                                                       |
| Kocyigit et al, 2016 [53] | LOGIQ E9, GE Healthcare<br><br>Linear probe, 15-9 MHz<br><br>B-mode + SE              | Lateral Epicondylitis<br><br>Elbow with LE: Medial portion: $0.45 \pm 0.12$ mean<br>Elbow with LE: Middle portion: $0.44 \pm 0.8$ mean<br>Elbow with LE: Lateral portion: $0.47 \pm 0.19$ mean<br><br>Healthy Elbow: Medial portion: $0.18 \pm 0.13$ mean<br>Healthy Elbow: Middle portion: $0.21 \pm 0.13$ mean<br>Healthy Elbow: Lateral portion: $0.20 \pm 0.14$ mean |
| Tudisco et al, 2015 [55]  | Philips iU22<br><br>Linear probe, 7.5 MHz<br><br>B-mode + SE                          | Unilateral Supraspinatus Tendon Tear<br><br>Affected Shoulder: $0.75 \pm 0.08$ mean<br>Healthy Shoulder: $1.01 \pm 0.07$ mean                                                                                                                                                                                                                                            |
| Ooi et al, 2015 [33]      | Philips iU22<br><br>Linear probe, 17-5 MHz                                            | Achilles Tendinopathy<br><br>Asymptomatic group:                                                                                                                                                                                                                                                                                                                         |

|                      |                                                            |                                                                                                              |
|----------------------|------------------------------------------------------------|--------------------------------------------------------------------------------------------------------------|
|                      | B-mode + SE                                                | 0.76 ± 0.30 (0.21-1.90) mean<br>Symptomatic group:<br>1.70 ± 0.84 (0.50-4.5) mean                            |
| Ahn et al, 2014 [58] | Philips iU22<br>Linear probe, 12-5 MHz<br>B-mode + PD + SE | Lateral Epicondylosis<br><br>Symptomatic Tendons: 1.45 ± 0.45 mean<br>Asymptomatic Tendons: 2.07 ± 0.70 mean |
